# Supplementary material for: Transformation Products of Emerging Pollutants Explored Using Non-Target Screening: Perspective in the Transformation Pathway and Toxicity Mechanism—A Review
Source: MDPI journal article supplement (doi:10.3390/toxics10020054), 2022-01-24
Supplement: s1 [file s1]

# Supplementary Materials: Transformation Products of Emerging Pollutants Explored Using Non-target Screening: Perspective in the Transformation Pathway and Toxicity Mechanism—A Review.

Thodhal-Yoganandham Suman, Soo-Yeon Kim, Dong-Hyuk Yeom and Junho Jeon

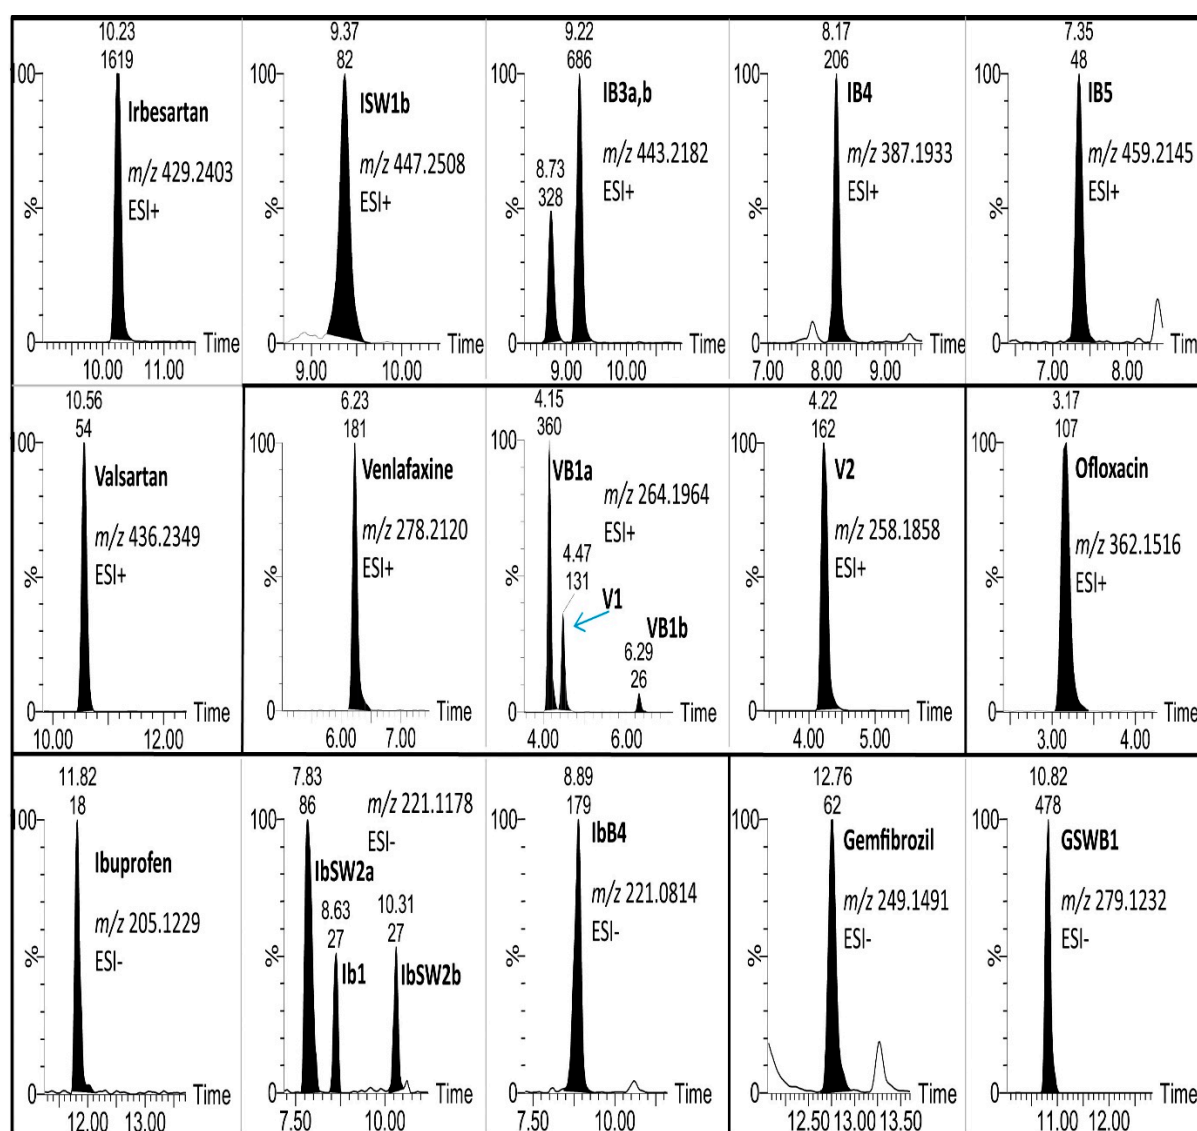

**Figure S1.** The contaminants selected and their metabolites/TPs in different EWW samples. (Reprinted from [46]. (Copyright 2016, Elsevier).

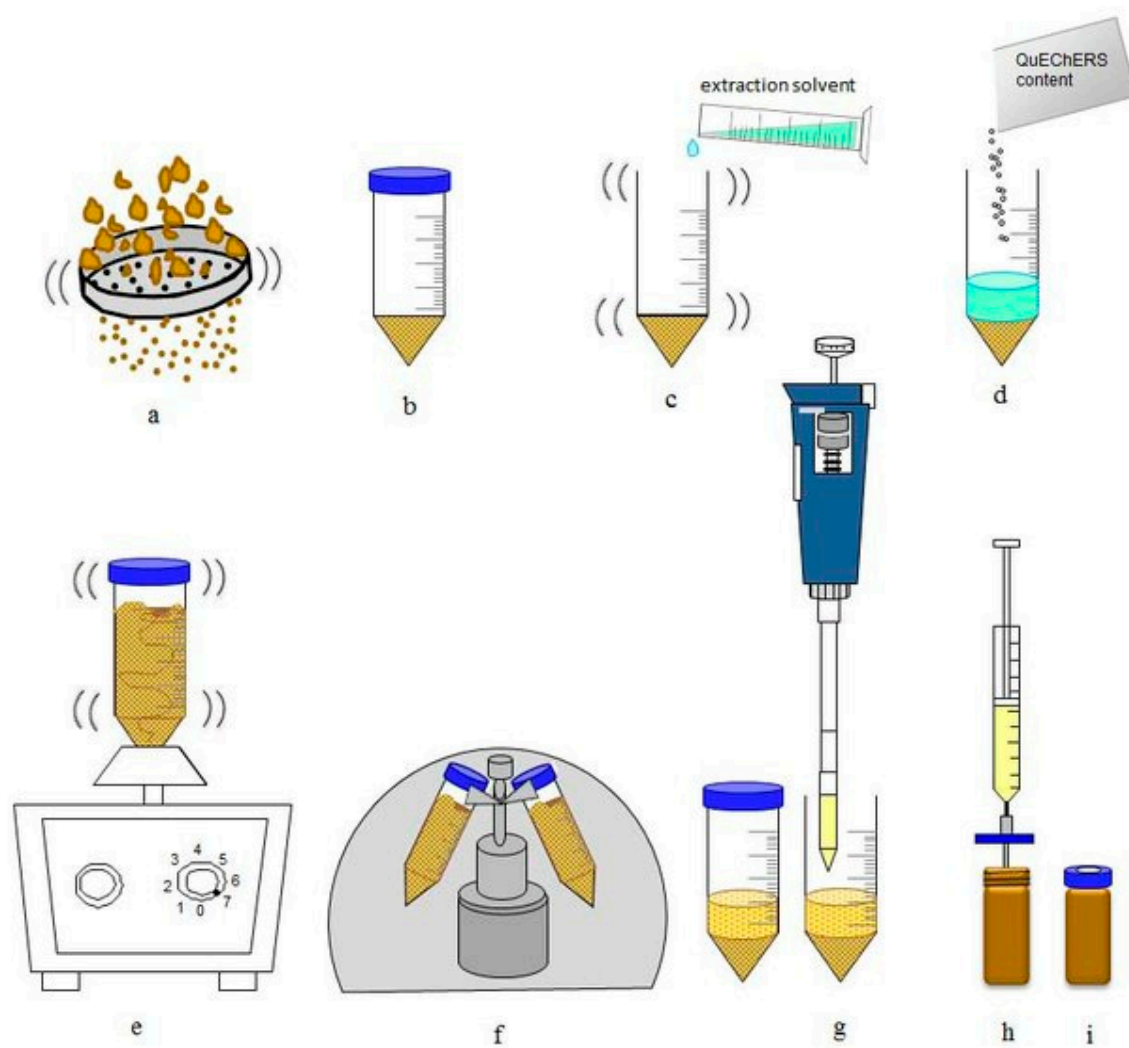

**Figure S2.** The diagram of separation process of diclofenac and transformation product. (Reprinted from [1], with permission of the publisher).

**A)**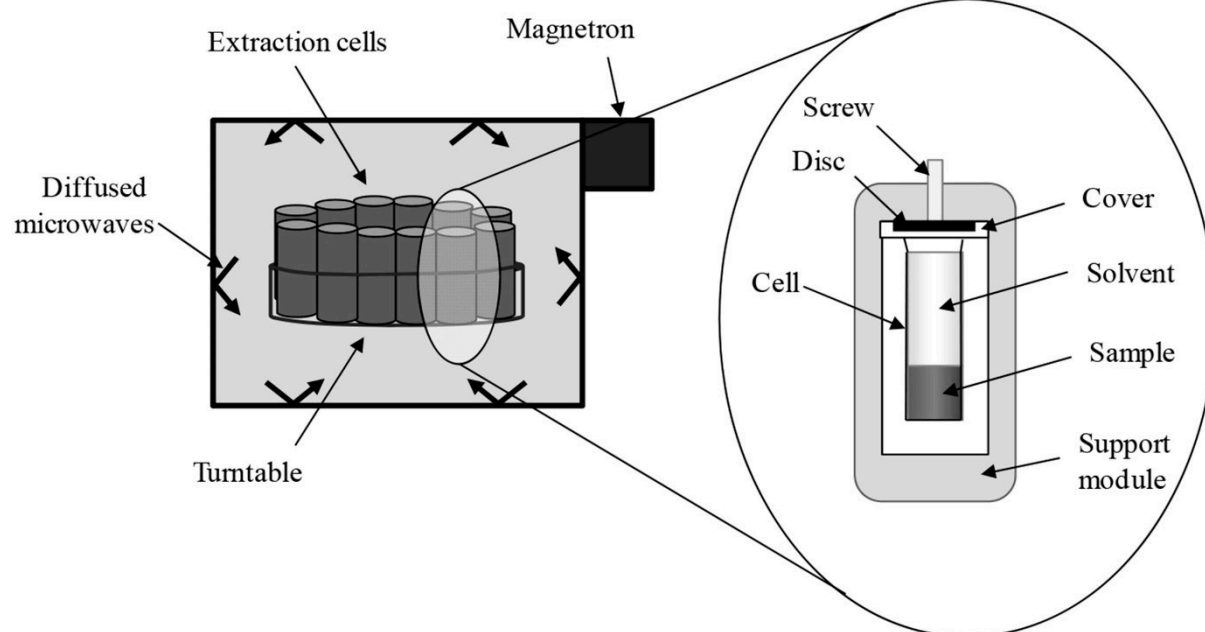**B)**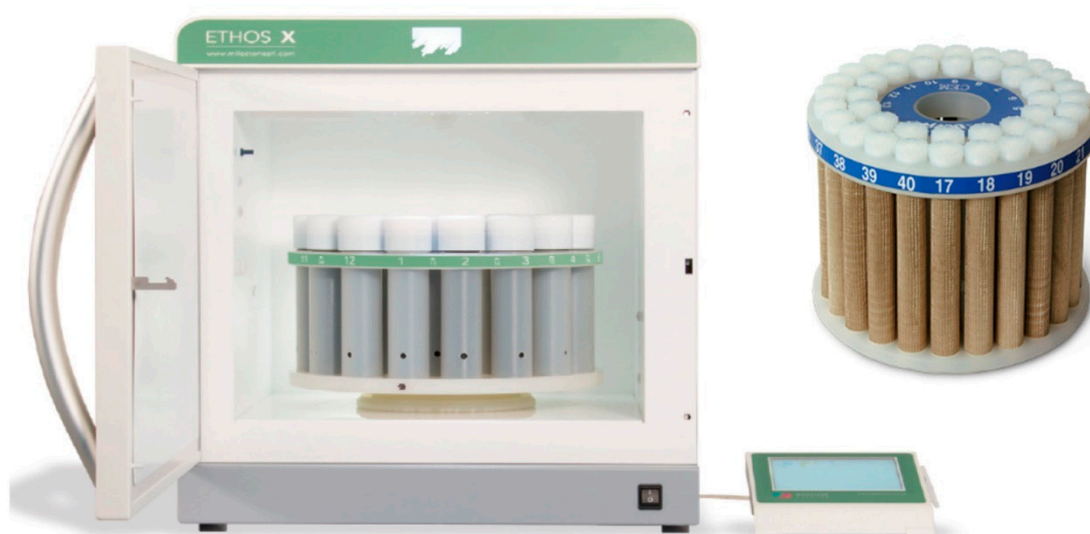

**Figure S3.** (A) Schematic view for a closed-vessel MAE system and (B) Commercial MAE instrument from Milestone and Carousel with 40 positions. (Reproduced with permission of Milestone, Inc.). (Reprinted from [2]. (Copyright 2019, Elsevier)).

Table S1 Summary for sample extraction method

| Type of extraction             | Principle                                                                                                                                                                                                       | Advantages                                                   | Disadvantages                                                                                                                                    |
|--------------------------------|-----------------------------------------------------------------------------------------------------------------------------------------------------------------------------------------------------------------|--------------------------------------------------------------|--------------------------------------------------------------------------------------------------------------------------------------------------|
| QuEChERS                       | The principle is similar solid phase and high performance liquid chromatography extraction. To achieve impurity removal, the adsorbent filler interacts with contaminants in the matrix to absorb impurities.   | Short Method development time<br>Low Cost                    | Large volumes of organics<br>Difficult to automate                                                                                               |
| Microwave-assisted extraction  | Small amount of solvent (15–40 mL), Fast extraction (12–18 min) ,Automated Easy to use Filtration not required, Large amount of sample (up to 100 g)                                                            | The reduction of the extraction time and solvent consumption | Clean-up required<br>Expensive equipment                                                                                                         |
| Pressurized liquid extraction  | Pressurized liquid extraction also known as pressurized fluid extraction or accelerated solvent extraction, is a method of extracting a sample using conventional solvents under high pressure and temperature. | Less extraction time and Closed system                       | An further drawback of PLE is its inability to effectively extract analytes from water-rich samples when utilizing hydrophobic organic solvents. |
| Ultrasonic-assisted extraction | Ultrasonication is the act of applying frequencies to agitate particles in a sample for extraction of analyte from tissue sample                                                                                | speed dissolution, by breaking intermolecular interactions.  | More expensive than other methods.                                                                                                               |

## References

- 1) Vera, J., Correia-Sá, L., Paíga, P., Bragança, I., Fernandes, V.C., Domingues, V.F. and Delerue-Matos, C., 2013. QuEChERS and soil analysis. An Overview. *Sample Preparation*. **2013**, 1, 54-77.
- 2) Llompart, M., Celeiro, M. and Dagnac, T., 2019. Microwave-assisted extraction of pharmaceuticals, personal care products and industrial contaminants in the environment. *TrAC Trends in Analytical Chemistry*, **2019**, 116, 136-150.
